# Supplementary material for: Analysis of canthin-6-one alkaloids derived from Eurycoma spp. by micellar liquid chromatography and conventional high-performance liquid chromatography: a comparative evaluation
Source: Royal Society of Chemistry journal article supplement (doi:10.1039/d2ra07034k), 2023-01-01
Supplement: d2ra07034k1.pdf [file d2ra07034k1.pdf]

## Electronic Supplementary Information (ESI)

### **Analysis of canthin-6-one alkaloids derived from *Eurycoma* spp. by micellar liquid chromatography and conventional high-performance liquid chromatography: A comparative evaluation**

Attapon Sakdamas,<sup>a</sup> Fonhip Makliang,<sup>b</sup> Waraporn Putalun,<sup>c</sup> Thaweesak Juengwatanatrakul,<sup>d</sup> Tripetch Kanchanapoom,<sup>c</sup> Seiichi Sakamoto<sup>e</sup> and Gorawit Yusakul<sup>\*a,f</sup>

---

<sup>a</sup> *School of Pharmacy, Walailak University, Nakhon Si Thammarat, Thailand*

<sup>b</sup> *School of Languages and General Education, Walailak University, Nakhon Si Thammarat, Thailand*

<sup>c</sup> *Faculty of Pharmaceutical Sciences, Khon Kaen University, Khon Kaen, Thailand*

<sup>d</sup> *Faculty of Pharmaceutical Sciences, Ubon Ratchathani University, Ubon Ratchathani, Thailand*

<sup>e</sup> *Graduate School of Pharmaceutical Sciences, Kyushu University, Higashi-ku, Fukuoka, Japan*

<sup>f</sup> *Biomass and Oil Palm Center of Excellence, Walailak University, Nakhon Si Thammarat, Thailand*

\*Corresponding author

Tel.: +66-75-67-2839, email: gorawit.yu@wu.ac.th, gorawit.yu@mail.wu.ac.th.

**Table of content****Supplementary Tables**

|                                                                                                                                                                   |    |
|-------------------------------------------------------------------------------------------------------------------------------------------------------------------|----|
| <b>Table S1</b> Experimental design by Box-Behnken design (BBD) of response surface methodology (RSM).....                                                        | 4  |
| <b>Table S2</b> Effect of sodium dodecyl sulfate (SDS) concentration on the elution of micellar liquid chromatography mobile phases .....                         | 4  |
| <b>Table S3</b> Effect of cetyltrimethylammonium bromide (CTAB) concentration on the elution of micellar liquid chromatography mobile phases .....                | 5  |
| <b>Table S4</b> Effect of Brij-35 concentration on the elution of micellar liquid chromatography mobile phases                                                    | 5  |
| <b>Table S5</b> Effect of pH on the elution of micellar liquid chromatography mobile phases with sodium dodecyl sulfate (SDS) .....                               | 5  |
| <b>Table S6</b> Effect of pH on the elution of micellar liquid chromatography mobile phases with cetyltrimethylammonium bromide (CTAB) .....                      | 6  |
| <b>Table S7</b> Effect of pH on the elution of micellar liquid chromatography mobile phases with Brij 35 .....                                                    | 6  |
| <b>Table S8</b> Effect of additives on elution of micellar liquid chromatography mobile phases .....                                                              | 6  |
| <b>Table S9</b> Effect of acetonitrile concentration on elution of micellar liquid chromatography mobile phases .....                                             | 7  |
| <b>Table S10</b> Effect of mobile phase composition from Box-Benhen Design of response surface methodology on the elution of micellar liquid chromatography ..... | 8  |
| <b>Table S11</b> ANOVA data of regression parameters for retention time of analytes .....                                                                         | 9  |
| <b>Table S12</b> ANOVA data of regression parameters for resolution of analytes.....                                                                              | 10 |
| <b>Table S13</b> Fit statistics and equations for retention time and resolution of analytes.....                                                                  | 11 |

**Supplementary Figures**

- Fig. S1** Effects of one factor on the response ( $Y_1$ – $Y_4$ , A – D, respectively), which the factors were included SDS concentration (mM), acetonitrile concentration (vol%), and pH. ....12
- Fig. S2** Contour plot represent the response plotted against combinations of acetonitrile concentration and pH of mobile phase, which A, B, and C are repones  $Y_1$ ,  $Y_2$ , and  $Y_4$ , respectively. ....13
- Fig. S3** Effects of one factor on the response ( $Y_5$  –  $Y_7$ , A – C, respectively), which the factors were included SDS concentration (mM), acetonitrile concentration (vol%), and pH.....14
- Fig. S4** Contour plot represent the response plotted against combinations of SDS concentration and pH (A) and acetonitrile concentration and pH (B), which A and B are repones  $Y_5$  and  $Y_6$ , respectively. ....15
- Fig. S5** Chromatograms of analytes (A: 1, C6OG: 2, HCO: 3, C6O: 4, MCO), and other compounds of EL roots (B, CHA: C, SCO: D, EUL: E, CPA: F, 13-EEU: G, EU). All compounds were analyted at 50  $\mu\text{g/mL}$  and detected at 272 nm. ....16

**Table S1** Experimental design by Box-Behnken design (BBD) of response surface methodology (RSM)

| Factors                              | Symbol | Unit | Level       |               |              |
|--------------------------------------|--------|------|-------------|---------------|--------------|
|                                      |        |      | Low<br>(-1) | Medium<br>(0) | High<br>(+1) |
| <b>Independent variables</b>         |        |      |             |               |              |
| Sodium dodecyl sulfate concentration | $X_1$  | mM   | 90          | 110           | 130          |
| Acetonitrile concentration           | $X_2$  | vol% | 5           | 10            | 15           |
| pH                                   | $X_3$  | -    | 3           | 5             | 7            |
| <b>Dependent variables</b>           |        |      |             |               |              |
| Retention time (C6OG)                | $Y_1$  | min  |             |               |              |
| Retention time (9HCO)                | $Y_2$  | min  |             |               |              |
| Retention time (C6O)                 | $Y_3$  | min  |             |               |              |
| Retention time (9MCO)                | $Y_4$  | min  |             |               |              |
| Resolution of C6OG and 9HCO          | $Y_5$  | -    |             |               |              |
| Resolution of 9HCO and C6O           | $Y_6$  | -    |             |               |              |
| Resolution of C6O and 9MCO           | $Y_7$  | -    |             |               |              |

**Table S2** Effect of sodium dodecyl sulfate (SDS) concentration on the elution of micellar liquid chromatography mobile phases

| SDS<br>concentration<br>(mM) <sup>1</sup> | Retention time (min) |       |       |       | Resolution |         |         |
|-------------------------------------------|----------------------|-------|-------|-------|------------|---------|---------|
|                                           | C6OG                 | HCO   | C6O   | MCO   | C6OG-HCO   | HCO-C6O | C6O-MCO |
| 30                                        | 8.13                 | 37.56 | 61.22 | 74.03 | 21.31      | 5.85    | 3.08    |
| 60                                        | 5.27                 | 19.54 | 31.04 | 37.29 | 16.65      | 7.93    | 2.53    |
| 90                                        | 4.27                 | 14.31 | 23.02 | 26.01 | 14.47      | 7.27    | 2.34    |
| 120                                       | 3.67                 | 11.4  | 18.13 | 21.03 | 12.91      | 6.76    | 2.14    |

<sup>1</sup>The mobile phase consisted of 10 mM NaH<sub>2</sub>PO<sub>4</sub> (pH 5)

**Table S3** Effect of cetyltrimethylammonium bromide (CTAB) concentration on the elution of micellar liquid chromatography mobile phases

| CTAB concentration (mM) <sup>1</sup> | Retention time (min) |       |       |       | Resolution |         |         |
|--------------------------------------|----------------------|-------|-------|-------|------------|---------|---------|
|                                      | C6OG                 | HCO   | C6O   | MCO   | C6OG-HCO   | HCO-C6O | C6O-MCO |
| 30                                   | 9.54                 | 51.95 | 51.95 | 57.62 | 17.41      | -       | 1.39    |
| 60                                   | 6.74                 | 27.94 | 27.94 | 30.67 | 14.95      | -       | 1.2     |
| 90                                   | 5.4                  | 19.73 | 19.73 | 21.62 | 12.6       | -       | 1.07    |
| 120                                  | 4.65                 | 15.51 | 15.51 | 16.97 | 11.25      | -       | 0.98    |

<sup>1</sup>The mobile phase consisted of 10 mM NaH<sub>2</sub>PO<sub>4</sub> (pH 5)

**Table S4** Effect of Brij-35 concentration on the elution of micellar liquid chromatography mobile phases

| Brij 35 concentration (mM) <sup>1</sup> | Retention time (min) |       |       |       | Resolution |         |         |
|-----------------------------------------|----------------------|-------|-------|-------|------------|---------|---------|
|                                         | C6OG                 | HCO   | C6O   | MCO   | C6OG-HCO   | HCO-C6O | C6O-MCO |
| 12.5                                    | 9.72                 | 71.52 | >80   | >80   | 29.04      | -       | -       |
| 25.0                                    | 7.87                 | 40.08 | 49.94 | 57.15 | 22.56      | 4.14    | 2.56    |
| 37.5                                    | 6.69                 | 28.19 | 35.59 | 40.02 | 18.94      | 4.04    | 2.04    |
| 50.0                                    | 5.83                 | 21.82 | 27.70 | 30.85 | 16.45      | 3.80    | 1.72    |

<sup>1</sup>The mobile phase consisted of 10 mM NaH<sub>2</sub>PO<sub>4</sub> (pH 5)

**Table S5** Effect of pH on the elution of micellar liquid chromatography mobile phases with sodium dodecyl sulfate (SDS)

| pH of mobile phase <sup>1</sup> | Retention Time (min) |       |       |       | Resolution |         |         |
|---------------------------------|----------------------|-------|-------|-------|------------|---------|---------|
|                                 | C6OG                 | HCO   | C6O   | MCO   | C6OG- HCO  | HCO-C6O | C6O-MCO |
| 3.0                             | 3.20                 | 11.54 | 21.81 | 24.40 | 13.23      | 7.98    | 1.28    |
| 5.0                             | 3.67                 | 11.4  | 18.13 | 21.03 | 12.91      | 6.76    | 2.14    |
| 7.0                             | 3.42                 | 10.19 | 16.25 | 17.74 | 12.23      | 6.64    | 1.24    |

<sup>1</sup>The mobile phase consisted of 120 mM SDS and 10 mM NaH<sub>2</sub>PO<sub>4</sub>

**Table S6** Effect of pH on the elution of micellar liquid chromatography mobile phases with cetyltrimethylammonium bromide (CTAB)

| pH of mobile phase <sup>1</sup> | Retention Time (min) |       |       |       | Resolution |         |         |
|---------------------------------|----------------------|-------|-------|-------|------------|---------|---------|
|                                 | C6OG                 | HCO   | C6O   | MCO   | C6OG- HCO  | HCO-C6O | C6O-MCO |
| 3.0                             | 4.43                 | 15.34 | 15.91 | 17.46 | 7.82       | -       | 0.78    |
| 5.0                             | 4.65                 | 15.51 | 15.51 | 16.97 | 11.25      | -       | 0.98    |
| 7.0                             | C6OG                 | C6O   | MCO   | HCO   | C6OG-C6O   | C6O-MCO | MCO-HCO |
|                                 | 5.16                 | 15.78 | 17.11 | 20.12 | 10.9       | 0.91    | 1.62    |

<sup>1</sup>The mobile phase consisted of 120 mM CTAB and 10 mM NaH<sub>2</sub>PO<sub>4</sub>

**Table S7** Effect of pH on the elution of micellar liquid chromatography mobile phases with Brij 35

| pH of mobile phase <sup>1</sup> | Retention Time (min) |       |       |       | Resolution |         |         |
|---------------------------------|----------------------|-------|-------|-------|------------|---------|---------|
|                                 | C6OG                 | HCO   | C6O   | MCO   | C6OG- HCO  | HCO-C6O | C6O-MCO |
| 3.0                             | 5.72                 | 25.77 | 33.89 | 37.55 | 16.63      | 3.79    | 1.39    |
| 5.0                             | 6.69                 | 28.19 | 35.59 | 40.02 | 18.94      | 4.04    | 2.04    |
| 7.0                             | 6.54                 | 26.39 | 34.47 | 38.59 | 15.70      | 3.80    | 1.60    |

<sup>1</sup>The mobile phase consisted of 37.5 mM Brij 35 and 10 mM NaH<sub>2</sub>PO<sub>4</sub>

**Table S8** Effect of additives on elution of micellar liquid chromatography mobile phases

| Additives <sup>1</sup> | Retention Time (min) |        |        |        | Resolution |         |         |
|------------------------|----------------------|--------|--------|--------|------------|---------|---------|
|                        | C6OG                 | HCO    | C6O    | MCO    | C6OG- HCO  | HCO-C6O | C6O-MCO |
| Acetonitrile           | 3.44                 | 11.857 | 18.953 | 23.200 | 12.03      | 3.65    | 1.43    |
| Butanol                | 2.723                | 7.977  | 12.107 | 13.447 | 10.16      | 3.47    | -       |
| Propanol               | 3.073                | 9.963  | 16.420 | 19.100 | 10.39      | 3.12    | 0.77    |
| Propylene glycol       | 3.323                | 11.717 | 20.320 | 24.493 | 9.86       | 3.00    | -       |

<sup>1</sup>The mobile phase consisted of 120 mM sodium dodecyl sulfate (SDS) and 10 mM NaH<sub>2</sub>PO<sub>4</sub> (pH 5). The mobile phase investigated all additives at 4% (v/v).

**Table S9** Effect of acetonitrile concentration on elution of micellar liquid chromatography mobile phases

| Acetonitrile<br>concentration | Retention Time (min) |        |        |        | Resolution |         |         |
|-------------------------------|----------------------|--------|--------|--------|------------|---------|---------|
|                               | C6OG                 | HCO    | C6O    | MCO    | C6OG- HCO  | HCO-C6O | C6O-MCO |
| 2%                            | 3.637                | 13.130 | 21.383 | 25.880 | 10.56      | 2.86    | 0.94    |
| 4%                            | 3.44                 | 11.857 | 18.953 | 23.200 | 12.03      | 3.65    | 1.43    |
| 10%                           | 3.150                | 9.983  | 16.707 | 19.393 | 10.97      | 4.67    | 1.25    |
| 15%                           | 2.683                | 8.133  | 14.477 | 16.340 | 9.00       | 4.86    | 0.95    |
| 20%                           | 2.337                | 6.010  | 11.337 | 12.510 | 12.59      | 6.12    | 0.89    |

<sup>†</sup>The mobile phase consisted of 120 mM sodium dodecyl sulfate (SDS) and 10 mM NaH<sub>2</sub>PO<sub>4</sub> (pH 5).

**Table S10** Effect of mobile phase composition from Box-Benhen Design of response surface methodology on the elusion of micellar liquid chromatography

| Experiments | Independent factors |       |       | Dependent factors |       |       |       |       |       |       |
|-------------|---------------------|-------|-------|-------------------|-------|-------|-------|-------|-------|-------|
|             | $X_1$               | $X_2$ | $X_3$ | $Y_1$             | $Y_2$ | $Y_3$ | $Y_4$ | $Y_5$ | $Y_6$ | $Y_7$ |
| 1           | 90                  | 5     | 5     | 4.34              | 16.65 | 27.32 | 33.62 | 10.02 | 3.54  | 1.37  |
| 2           | 130                 | 5     | 5     | 3.50              | 11.85 | 19.00 | 22.70 | 9.88  | 3.65  | 1.25  |
| 3           | 90                  | 15    | 5     | 3.06              | 10.46 | 19.22 | 22.01 | 9.04  | 4.52  | 0.96  |
| 4           | 130                 | 15    | 5     | 2.80              | 8.37  | 14.66 | 16.51 | 9.25  | 4.80  | 0.94  |
| 5           | 90                  | 10    | 3     | 5.48              | 23.02 | 45.50 | 53.15 | 12.66 | 6.83  | 1.60  |
| 6           | 130                 | 10    | 3     | 4.20              | 16.71 | 32.32 | 37.90 | 11.46 | 6.31  | 1.57  |
| 7           | 90                  | 10    | 7     | 3.52              | 11.05 | 20.54 | 21.86 | 6.63  | 2.63  | 0.42  |
| 8           | 130                 | 10    | 7     | 3.09              | 8.76  | 15.68 | 16.44 | 9.30  | 3.14  | 0.35  |
| 9           | 110                 | 5     | 3     | 4.06              | 17.58 | 32.83 | 40.42 | 13.74 | 5.98  | 1.98  |
| 10          | 110                 | 15    | 3     | 3.63              | 16.16 | 25.43 | 35.90 | 12.48 | 4.13  | 3.16  |
| 11          | 110                 | 5     | 7     | 3.67              | 11.40 | 20.58 | 21.58 | 9.06  | 2.67  | 0.63  |
| 12          | 110                 | 15    | 7     | 2.82              | 8.06  | 15.27 | 16.37 | 9.31  | 3.53  | 0.70  |
| 13          | 110                 | 10    | 5     | 3.34              | 11.15 | 18.43 | 22.48 | 8.57  | 3.45  | 1.33  |
| 14          | 110                 | 10    | 5     | 3.30              | 10.97 | 18.31 | 22.29 | 8.84  | 3.59  | 1.34  |
| 15          | 110                 | 10    | 5     | 3.39              | 11.18 | 18.21 | 22.11 | 8.99  | 3.31  | 1.25  |
| 16          | 110                 | 10    | 5     | 3.39              | 11.18 | 18.25 | 22.12 | 8.70  | 3.32  | 1.24  |
| 17          | 110                 | 10    | 5     | 3.39              | 10.96 | 18.19 | 21.99 | 8.85  | 3.85  | 1.42  |



**Table S11** ANOVA data of regression parameters for retention time of analytes

| Source      | $Y_1$                                           |         |         | $Y_2$                                           |         |         | $Y_3$                                           |         |         | $Y_4$                                           |         |         |
|-------------|-------------------------------------------------|---------|---------|-------------------------------------------------|---------|---------|-------------------------------------------------|---------|---------|-------------------------------------------------|---------|---------|
|             | Sum of Squares                                  | F-value | p-value |
| Model       | Reduced quadratic model<br>(Transform: Inverse) |         |         |
|             | 0.0301                                          | 25.61   | <0.0001 | 0.0080                                          | 85.47   | <0.0001 | 0.0026                                          | 79.81   | <0.0001 | 0.0025                                          | 92.25   | <0.0001 |
| $X_1$       | 0.0041                                          | 24.24   | 0.0008  | 0.0010                                          | 52.30   | <0.0001 | 0.0004                                          | 60.22   | <0.0001 | 0.0003                                          | 61.93   | <0.0001 |
| $X_2$       | 0.0098                                          | 58.36   | <0.0001 | 0.0016                                          | 84.17   | <0.0001 | 0.0004                                          | 61.38   | <0.0001 | 0.0003                                          | 57.14   | <0.0001 |
| $X_3$       | 0.0108                                          | 64.14   | <0.0001 | 0.0047                                          | 253.74  | <0.0001 | 0.0013                                          | 205.23  | <0.0001 | 0.0017                                          | 307.90  | <0.0001 |
| $X_1X_2$    | -                                               | -       | -       | -                                               | -       | -       | -                                               | -       | -       | -                                               | -       | -       |
| $X_1X_3$    | -                                               | -       | -       | -                                               | -       | -       | -                                               | -       | -       | -                                               | -       | -       |
| $X_2X_3$    | 0.0007                                          | 4.27    | 0.0686  | 0.0002                                          | 13.24   | 0.0039  | -                                               | -       | -       | 0.0000                                          | 6.18    | 0.0303  |
| $X_1^2$     | 0.0008                                          | 4.71    | 0.0581  | -                                               | -       | -       | 0.0000                                          | 7.51    | 0.0192  | -                                               | -       | -       |
| $X_2^2$     | 0.0011                                          | 6.62    | 0.0300  | -                                               | -       | -       | -                                               | -       | -       | -                                               | -       | -       |
| $X_3^2$     | 0.0029                                          | 17.55   | 0.0023  | 0.0004                                          | 23.88   | 0.0005  | 0.0004                                          | 62.08   | <0.0001 | 0.0002                                          | 28.11   | 0.0003  |
| Residual    | 0.0015                                          |         |         | 0.0002                                          |         |         | 0.0001                                          |         |         | 0.0001                                          |         |         |
| Lack of Fit | 0.0015                                          | 23.74   | 0.0044  | 0.0002                                          | 33.80   | 0.0021  | 0.0001                                          | 124.57  | 0.0002  | 0.0001                                          | 56.74   | 0.0008  |
| Pure Error  | 0.0000                                          |         |         | 3.404E-06                                       |         |         | 3.297E-07                                       |         |         | 6.015E-07                                       |         |         |
| Cor Total   | 0.0316                                          |         |         | 0.0082                                          |         |         | 0.0027                                          |         |         | 0.0026                                          |         |         |

**Table S12** ANOVA data of regression parameters for resolution of analytes

| Source      | $Y_5$                                                |         |         | $Y_6$                                          |         |         | $Y_7$                                                |         |         |
|-------------|------------------------------------------------------|---------|---------|------------------------------------------------|---------|---------|------------------------------------------------------|---------|---------|
|             | Sum of Squares                                       | F-value | p-value | Sum of Squares                                 | F-value | p-value | Sum of Squares                                       | F-value | p-value |
| Model       | Reduced quadratic model<br>(Transform: Inverse Sqrt) |         |         | Reduced 2FI model<br>(Transform: Inverse Sqrt) |         |         | Reduced quadratic model<br>(Transform: Inverse Sqrt) |         |         |
|             | 0.0120                                               | 33.64   | <0.0001 | 0.0603                                         | 19.44   | <0.0001 | 1.28                                                 | 30.19   | <0.0001 |
| $X_1$       | 0.0003                                               | 4.77    | 0.0539  | -                                              | -       | -       | 0.0053                                               | 0.7490  | 0.4069  |
| $X_2$       | 0.0002                                               | 2.74    | 0.1288  | 0.0019                                         | 1.88    | 0.1935  | 0.0010                                               | 0.1450  | 0.7113  |
| $X_3$       | 0.0076                                               | 128.00  | <0.0001 | 0.0518                                         | 50.04   | <0.0001 | 0.9987                                               | 141.47  | <0.0001 |
| $X_1X_2$    | -                                                    | -       | -       | -                                              | -       | -       | -                                                    | -       | -       |
| $X_1X_3$    | 0.0014                                               | 23.49   | 0.0007  | -                                              | -       | -       | -                                                    | -       | -       |
| $X_2X_3$    | -                                                    | -       | -       | 0.0066                                         | 6.41    | 0.0250  | -                                                    | -       | -       |
| $X_1^2$     | -                                                    | -       | -       | -                                              | -       | -       | 0.1298                                               | 18.33   | 0.0016  |
| $X_2^2$     | 0.0012                                               | 19.42   | 0.0013  | -                                              | -       | -       | 0.0406                                               | 5.75    | 0.0374  |
| $X_3^2$     | 0.0013                                               | 21.05   | 0.0010  | -                                              | -       | -       | 0.1039                                               | 14.73   | 0.0033  |
| Residual    | 0.0006                                               |         |         | 0.0134                                         |         | -       | 0.0705                                               |         |         |
| Lack of Fit | 0.0006                                               | 9.78    | 0.0224  | 0.0123                                         | 4.93    | 0.0695  | 0.0682                                               | 19.80   | 0.0061  |
| Pure Error  | 0.0000                                               |         |         | 0.0011                                         |         |         | 0.0023                                               |         |         |
| Cor Total   | 0.0126                                               |         |         | 0.0738                                         |         |         | 1.35                                                 |         |         |

**Table S13** Fit statistics and equations for retention time and resolution of analytes

| Response | Std. Dev. | Mean   | C.V. % | $R^2$  | Adjusted | Predicted | Coded equation                                                                                                       |
|----------|-----------|--------|--------|--------|----------|-----------|----------------------------------------------------------------------------------------------------------------------|
|          |           |        |        |        | $R^2$    | $R^2$     |                                                                                                                      |
| $Y_1$    | 0.0130    | 0.2861 | 4.53   | 0.9522 | 0.9150   | 0.5782    | $1/Y_1 = 0.2974 + 0.0226X_1 + 0.0350X_2 + 0.0367X_3 + 0.0134(X_2 X_3) - 0.0137X_1^2 + 0.0163(X_2^2) - 0.0265(X_3^2)$ |
| $Y_2$    | 0.0043    | 0.0852 | 5.06   | 0.9749 | 0.9635   | 0.8870    | $1/Y_2 = 0.0901 + 0.0110X_1 + 0.0140X_2 + 0.0243X_3 + 0.0078X_2X_3 - 0.0102X_3^2$                                    |
| $Y_3$    | 0.0026    | 0.0490 | 5.23   | 0.9732 | 0.9610   | 0.9171    | $1/Y_3 = 0.0552 + 0.0070X_1 + 0.0071X_2 + 0.0130X_3 - 0.0034X_1^2 - 0.0098X_3^2$                                     |
| $Y_4$    | 0.0023    | 0.0422 | 5.55   | 0.9767 | 0.9661   | 0.9066    | $1/Y_4 = 0.0450 + 0.0065X_1 + 0.0063X_2 + 0.0145X_3 + 0.0029X_2X_3 - 0.0060X_3^2$                                    |
| $Y_5$    | 0.0077    | 0.3228 | 2.39   | 0.9528 | 0.9245   | 0.7481    | $1/\text{Sqrt}(Y_5) = 0.3387 - 0.0060X_1 + 0.0045X_2 + 0.0309X_3 - 0.0187X_1X_3 - 0.0165X_2^2 - 0.0172X_3^2$         |
| $Y_6$    | 0.0322    | 0.5096 | 6.31   | 0.8178 | 0.7757   | 0.6183    | $1/\text{Sqrt}(Y_6) = 0.5096 - 0.0156X_2 + 0.0804X_3 - 0.0407X_2X_3$                                                 |
| $Y_7$    | 0.0840    | 0.9833 | 8.54   | 0.9477 | 0.9163   | 0.7949    | $1/\text{Sqrt}(Y_6) = 0.8732 + 0.0257X_1 + 0.0113X_2 + 0.3533X_3 + 0.1752X_1^2 - 0.0982X_2^2 + 0.1571X_3^2$          |

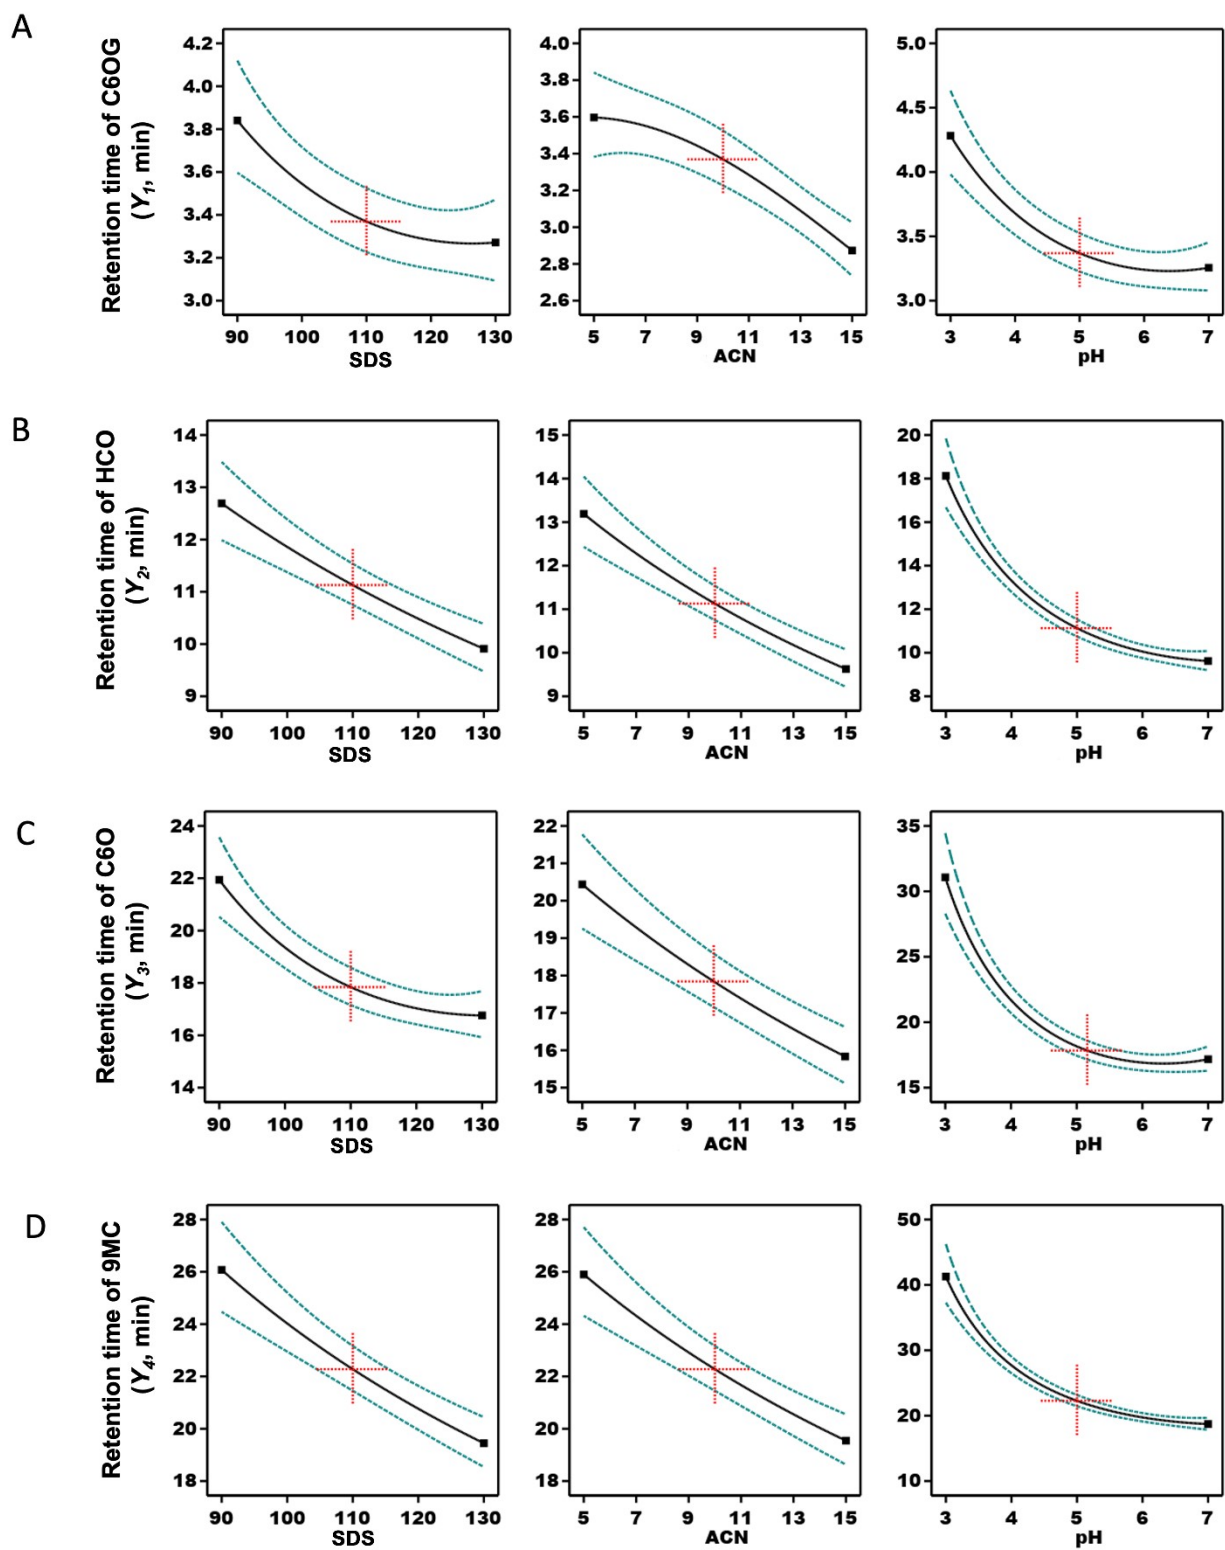

**Fig. S1** Effects of one factor on the response ( $Y_1$ – $Y_4$ , A–D, respectively), which the factors were included SDS concentration (mM), acetonitrile concentration (vol%), and pH.

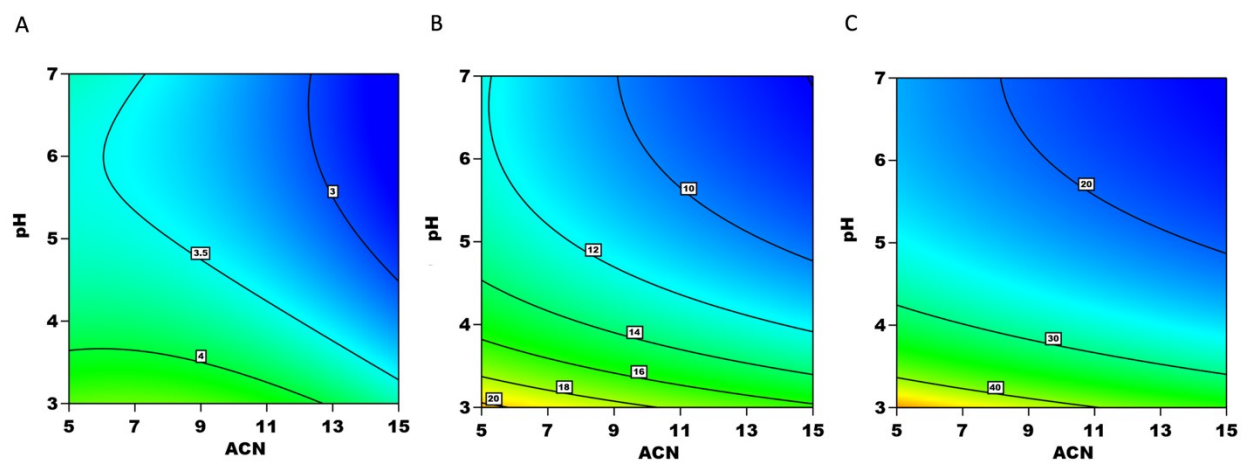

**Fig. S2** Contour plot represent the response plotted against combinations of acetonitrile concentration and pH of mobile phase, which A, B, and C are reponses  $Y_1$ ,  $Y_2$ , and  $Y_4$ , respectively.

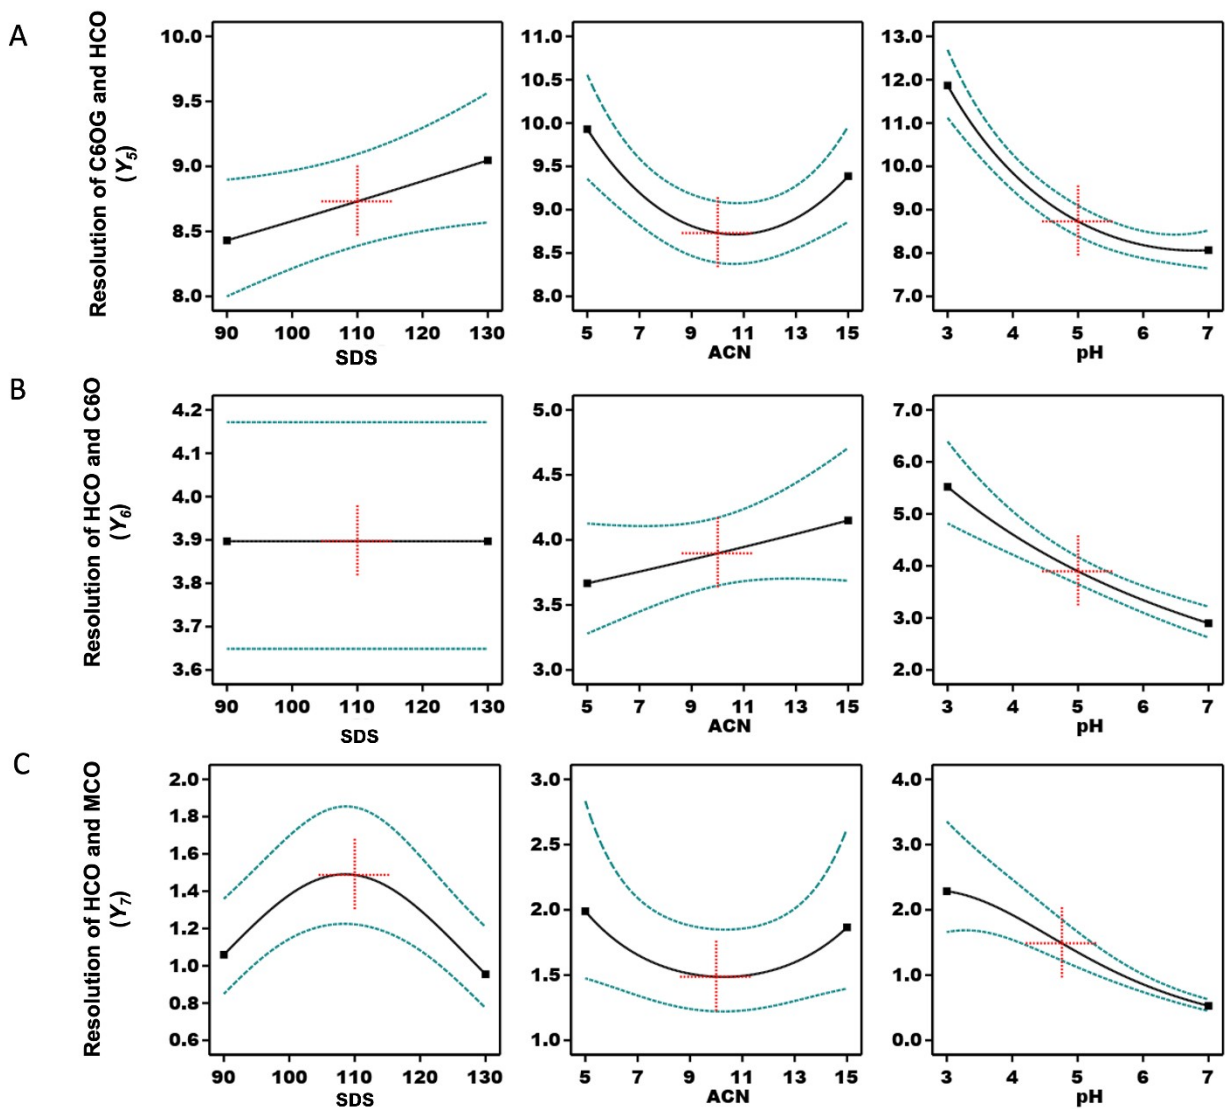

**Fig. S3** Effects of one factor on the response ( $Y_5 - Y_7$ , A - C, respectively), which the factors were included SDS concentration (mM), acetonitrile concentration (vol%), and pH.

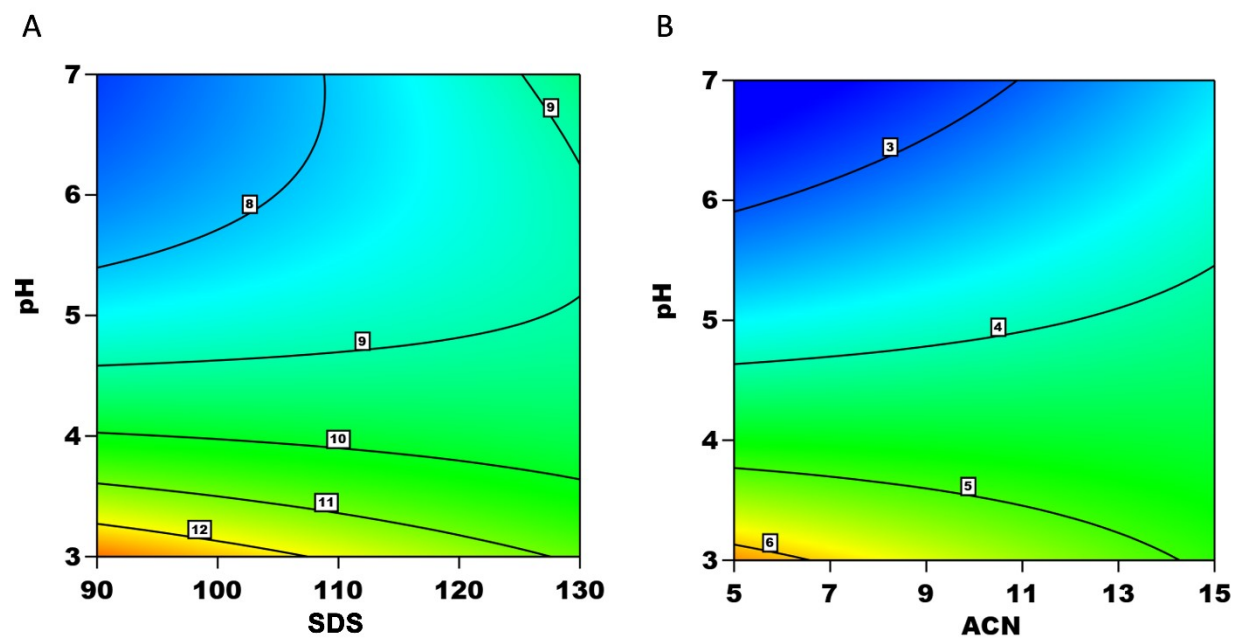

**Fig. S4** Contour plot represent the response plotted against combinations of SDS concentration and pH (A) and acetonitrile concentration and pH (B), which A and B are reponses  $Y_5$  and  $Y_6$ , respectively.

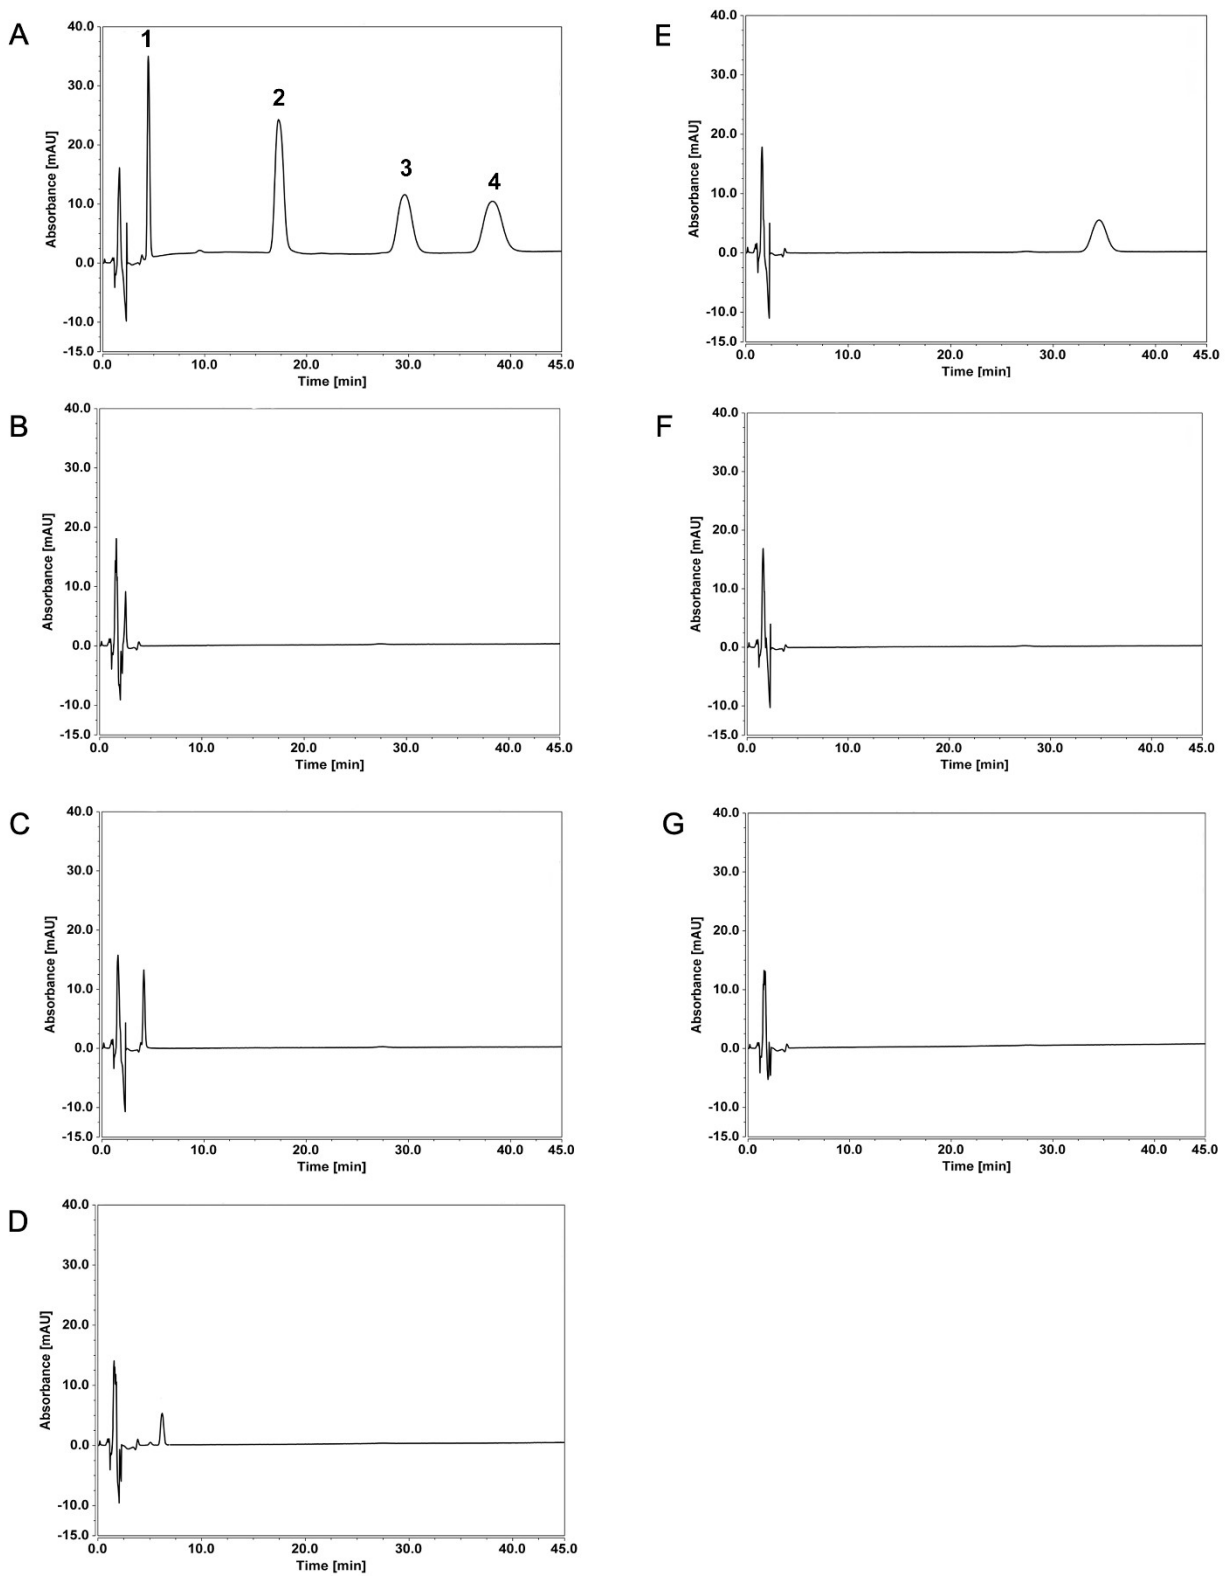

**Fig. S5** Chromatograms of analytes (A: 1, C6OG: 2, HCO: 3, C6O: 4, MCO), and other compounds of EL roots (B, CHA: C, SCO: D, EUL: E, CPA: F, 13-EEU: G, EU). All compounds were analyzed at 50  $\mu\text{g}/\text{mL}$  and detected at 272 nm.
